# Supplementary material for: Bipartite structure of the inactive mouse X chromosome
Source: PubMed Central journal article supplement (PMC4539712; doi:10.1186/s13059-015-0728-8), 2015-08-07

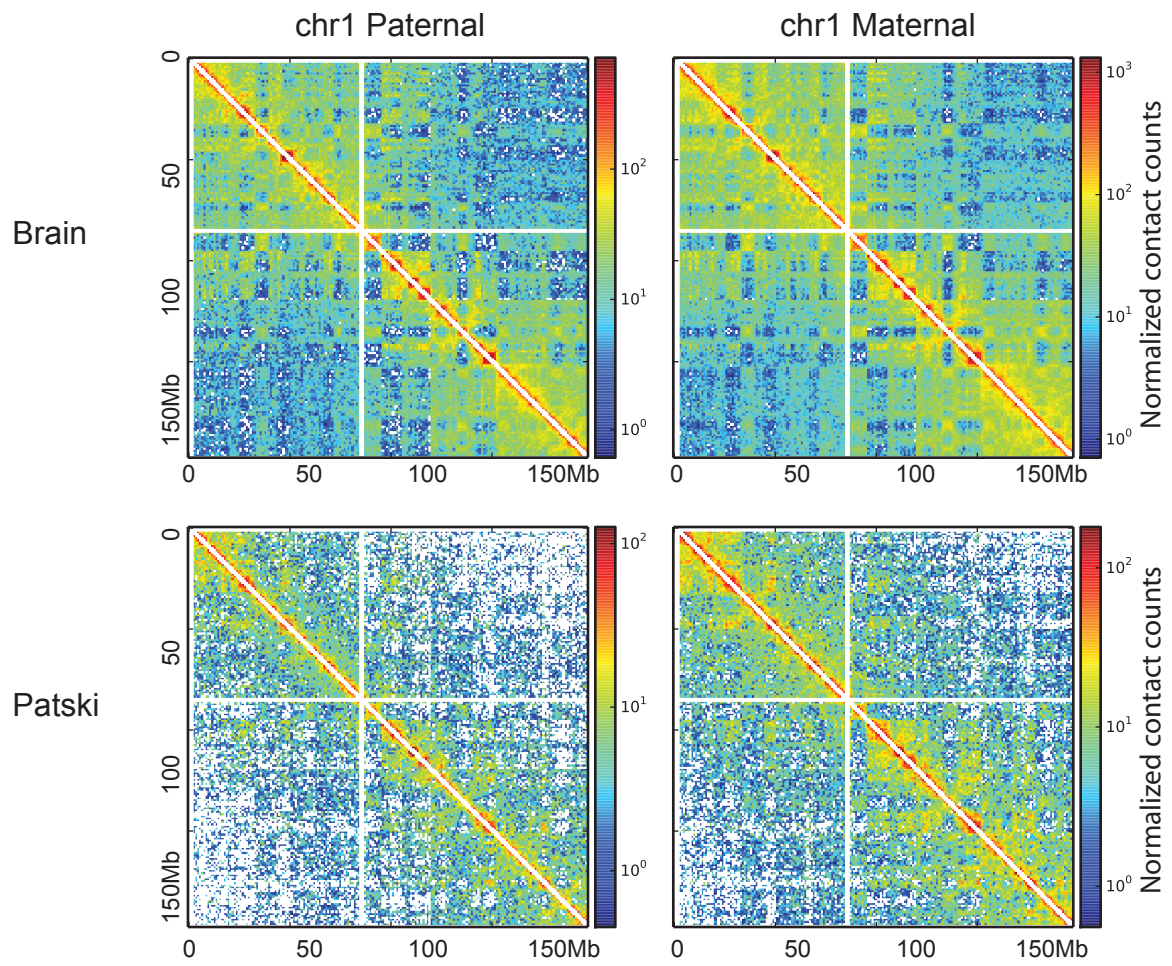

Supplement: 13059_2015_728_MOESM3_ESM.pdf [file 13059_2015_728_MOESM3_ESM.pdf]
